# Supplementary material for: Validation of Genomics-Based Prognostic Tests in Malignant Pleural Mesothelioma
Source: Oxford University Press journal article supplement (doi:10.1158/1078-0432.ccr-04-2181), 2005-06-15
Supplement: 10780432ccr042181-sup-supplemental_table_1.xls [file 10780432ccr042181-sup-supplemental_table_1.xls]

## Sheet: Clinical Data
Sample	survival	censor	histological subtype	node status	margins	Brigham stage
Tumor 01	5.95068	uncensored	epithelial	positive	positive	2
Tumor 03	17.1945	uncensored	mixed	positive	positive	3
Tumor 04	15.7151	uncensored	mixed	positive	positive	2
Tumor 05	8.97534	uncensored	epithelial	positive	positive	3
Tumor 06	4.30685	uncensored	epithelial	positive	positive	2
Tumor 07	3.15616	uncensored	epithelial	positive	positive	2
Tumor 08	11.1452	uncensored	epithelial	negative	positive	2
Tumor 09	38.8603	censored	epithelial	positive	positive	3
Tumor 10	36.0658	censored	epithelial	positive	positive	3
Tumor 11	34.7178	uncensored	epithelial	negative	positive	2
Tumor 12	34.2575	censored	epithelial	positive	positive	2
Tumor 13	16.537	uncensored	epithelial	positive	negative	2
Tumor 14	36.6247	censored	epithelial	positive	positive	3
Tumor 15	9.23836	uncensored	epithelial	positive	positive	3
Tumor 16	6.44384	uncensored	mixed	positive	positive	3
Tumor 17	7.52877	uncensored	epithelial	positive	negative	3
Tumor 18	28.3397	uncensored	epithelial	positive	positive	3
Tumor 19	35.4411	censored	epithelial	negative	negative	1
Tumor 20	6.80548	uncensored	mixed	positive	positive	3
Tumor 21	14.2685	uncensored	epithelial	negative	positive	3
Tumor 22	33.074	uncensored	epithelial	positive	positive	3
Tumor 23	18.8712	uncensored	mixed	positive	positive	3
Tumor 25	30.411	censored	epithelial	negative	positive	2
Tumor 26	12.8877	uncensored	epithelial	positive	negative	3
Tumor 27	2.46575	uncensored	mixed	positive	positive	3
Tumor 28	16.7342	uncensored	mixed	positive	positive	3
Tumor 29	4.56986	uncensored	epithelial	positive	positive	3
Tumor 30	5.68767	uncensored	epithelial	positive	positive	3
Tumor 31	13.8082	censored	mixed	negative	positive	3
Tumor 32	21.0411	uncensored	mixed	negative	positive	2
Tumor 33	14.4	uncensored	mixed	positive	positive	3
Tumor 34	24.8219	censored	epithelial	negative	negative	3
Tumor 36	0.789041	uncensored	mixed	positive	positive	3
Tumor 37	5.32603	uncensored	mixed	positive	positive	3
Tumor 38	12.2301	uncensored	epithelial	positive	positive	3
Tumor 39	8.71233	uncensored	mixed	positive	positive	3
Tumor 40	16.3726	uncensored	mixed	positive	positive	2
Tumor 41	7.85753	uncensored	mixed	positive	positive	3
Tumor 42	8.12055	uncensored	mixed	positive	positive	3

## Sheet: Column Notes
Age in years
Survival in months
Censor=alive at follow-up, uncensored=deceased at follow-up
For details on node status, margins, and Brigham Staging for mesothelioma see Sugarbaker et al.
J Thorac Cardiovasc Surg. 117: 54-65, 1999.
